# Supplementary material for: Effects of adsorption of O2 and H2O molecules on the corrosion behavior of the NiTi alloy surface: a DFT investigation
Source: Royal Society of Chemistry journal article supplement (doi:10.1039/d4cp02631d), 2024-01-01
Supplement: d4cp02631d1.pdf [file d4cp02631d1.pdf]

## First-principles investigation on the corrosion resistance difference between the NiTi-B<sub>2</sub> and NiTi-B19' phases

Xiaoting Wang<sup>1</sup>, Dong Xie<sup>1\*</sup>, MingXi Hou<sup>1</sup>, Min Guan<sup>1</sup> and Yongxiang Leng<sup>2\*</sup>

<sup>1</sup> School of Physical Science and Technology, Southwest Jiaotong University, Chengdu 610031, China

<sup>2</sup> Sichuan Province International Science and Technology Cooperation Base of Functional Materials,  
College of Medicine, Southwest Jiaotong University, Chengdu 610031, China

\* Correspondence: xiedong@home.swjtu.edu.cn (D. Xie); yxleng@263.net (Y.X. Leng)

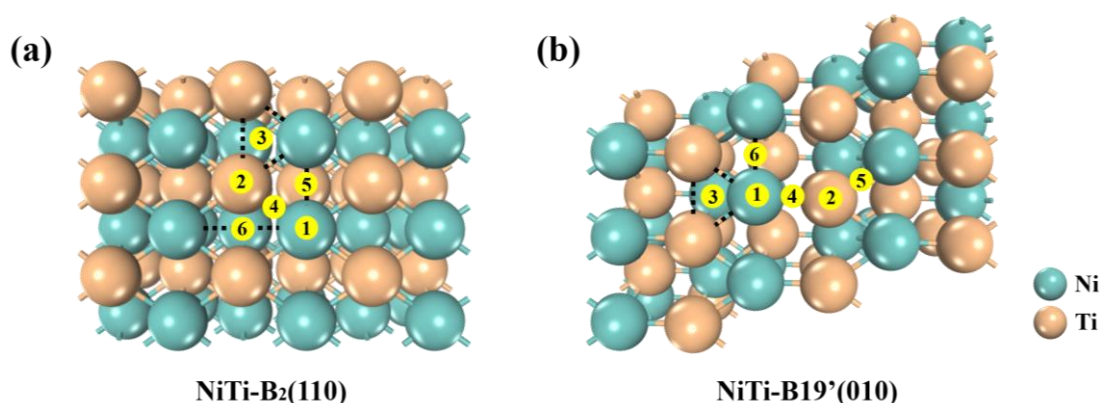

**Fig. S1** Top views of the (a) NiTi-B<sub>2</sub>(110) and (b) NiTi-B19'(010) surfaces with the following adsorption sites: 1 (above the Ni atom, referred to as Ni top), 2 (above the Ti atom, referred to as Ti top), and 3 (above a triangle formed by Ti and Ni atoms, hexagonal close-packed sites, referred to as Hcp). For the (a) NiTi-B<sub>2</sub>(110) surface, sites labeled 4, 5, and 6 correspond to a bridge between Ni and Ti atoms (NiTi Bridge), a short bridge between two Ni atoms (NiNi Bridge-1), and a long bridge between two Ni atoms (NiNi-Bridge-2), respectively. For the (b) NiTi-B19'(010) surface, sites labeled 4 and 5 are bridges between Ni and Ti atoms (NiTi Bridge-1 and NiTi Bridge-2, respectively), and site 6 bridges between Ni atoms (NiNi Bridge). The solid yellow circle indicates the adsorption site.

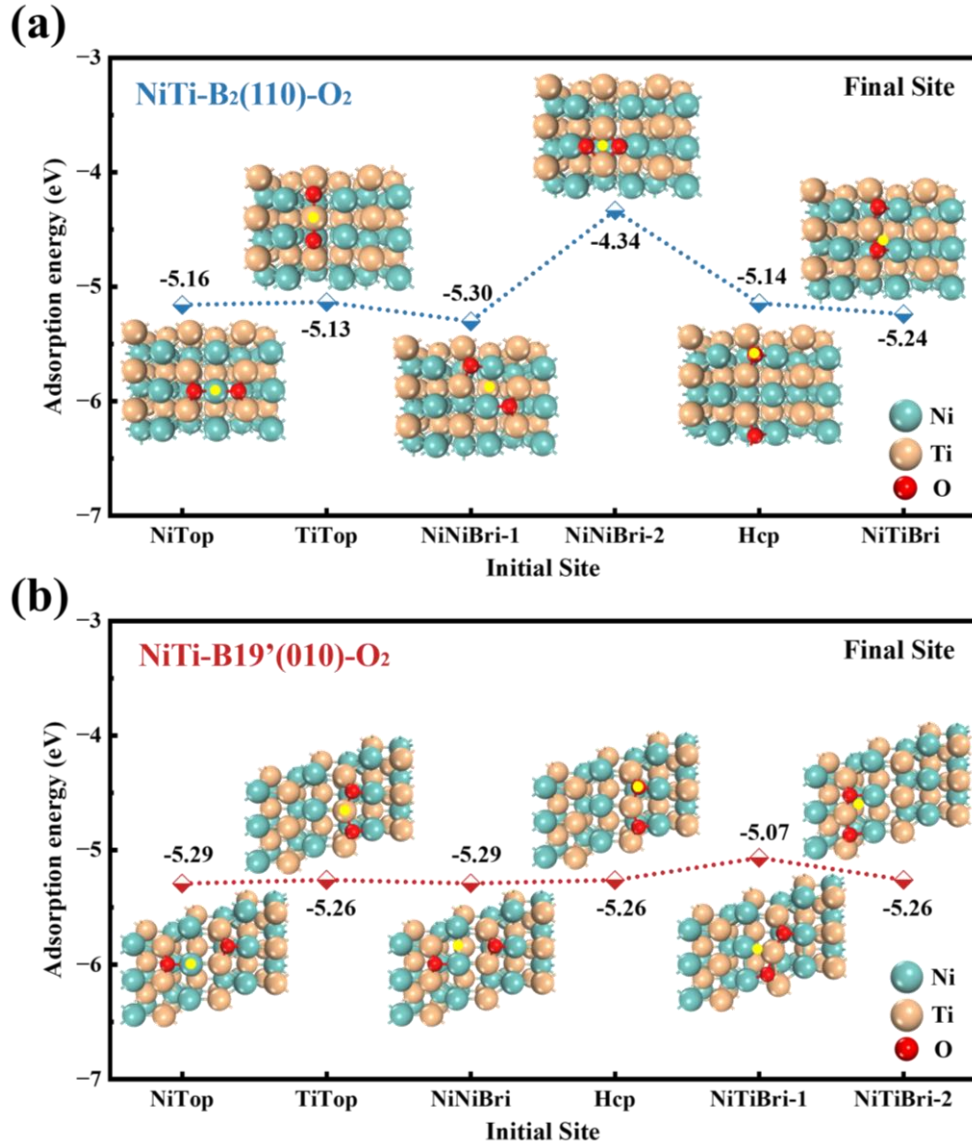

**Fig. S2** Adsorption energy ( $E_{ads}$ ) of one  $O_2$  molecule on the  $NiTi-B_2(110)$  and  $NiTi-B19'(010)$  surface at varied sites as well as the corresponding stable adsorbed structure. The solid yellow circle indicates the initial site of the  $O_2$  molecule. The  $E_{ads}$  of an  $O$  atom on each site was calculated using expression:  $E_{ads} = \frac{1}{2} [E_{O_2/stab} - E_{slab} - E_{O_2}]$ , where  $E_{O_2/stab}$ ,  $E_{slab}$ , and  $E_{O_2}$  denote the total energy of the oxygen adsorbed slab, the slab before adsorption, and an isolated  $O_2$  molecule, respectively.

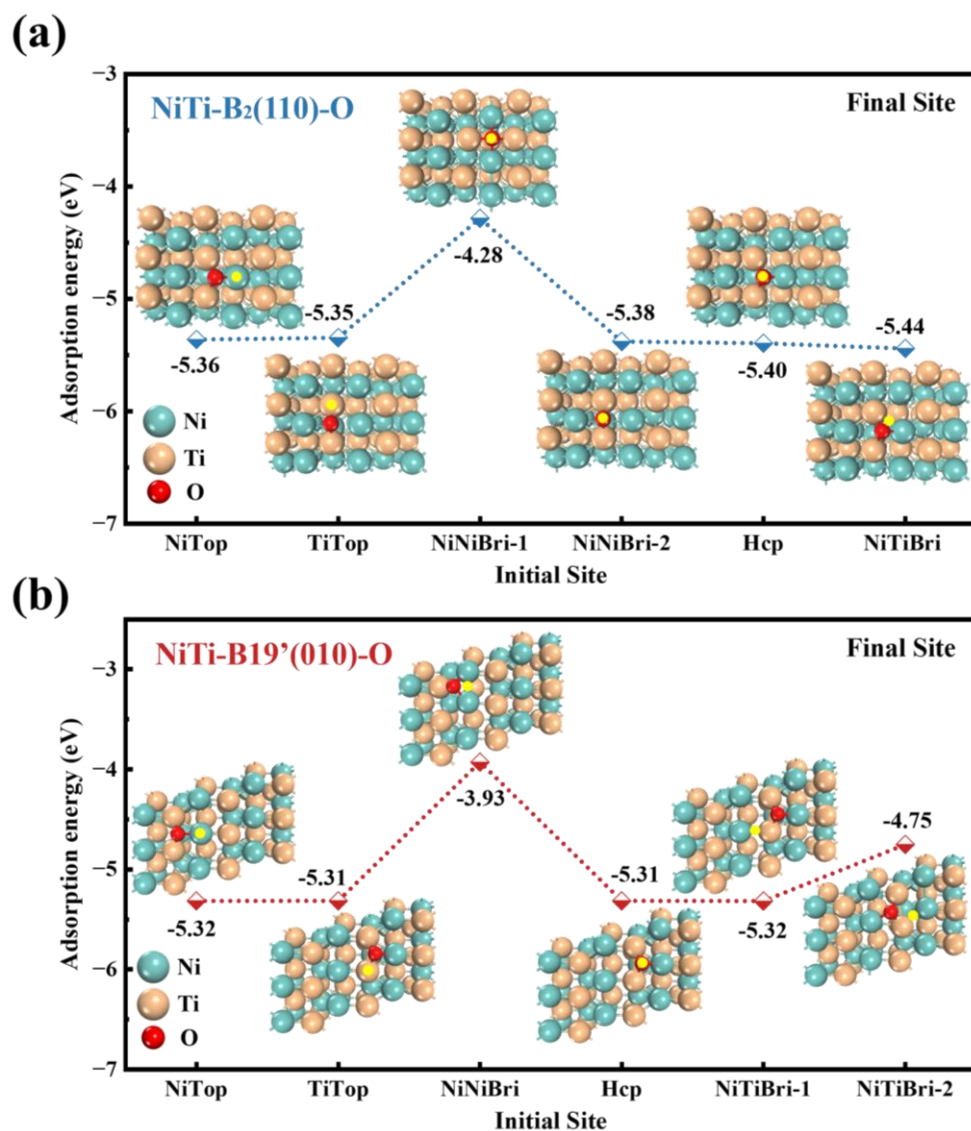

**Fig. S3** Adsorption energy ( $E_{\text{ads}}$ ) of an O atom on the NiTi-B<sub>2</sub>(110) and NiTi-B19'(010) surfaces at varied sites as well as the corresponding stable adsorbed structure. The solid yellow circle indicates the initial site of the O atom.

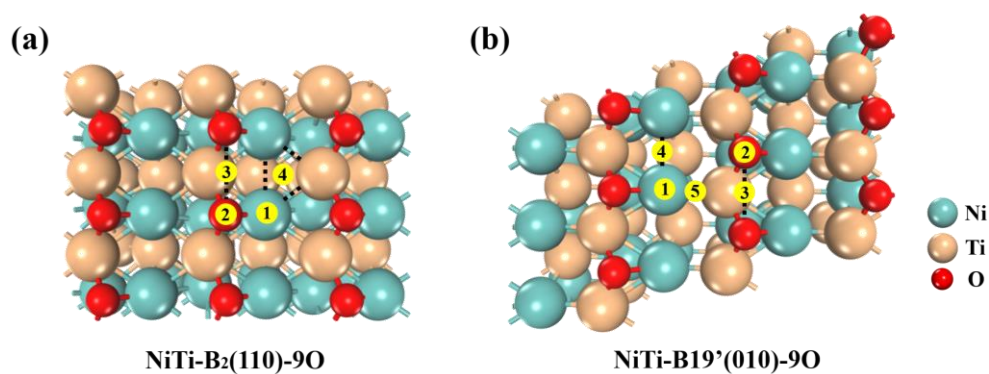

**Fig. S4** Top views of the (a) NiTi-B<sub>2</sub>(110)-9O and (b) NiTi-B19'(010)-9O surfaces with the following adsorption sites: 1 (above the Ni atom, namely, Ni top), 2 (above the O atom, namely, O top), and the sites labeled 3 correspond to a bridge between O and O atoms (namely, OO Bridge).

For the NiTi-B<sub>2</sub>(110)-9O surface, the sites labeled 4 correspond to a triangle formed by Ti and Ni atoms, namely, Hcp. For the NiTi-B19'(010)-9O surface, the sites labeled 4 is bridge between Ni atoms, namely, NiNi Bridge; and the site labeled 5 is bridging between Ni and Ti atoms (namely, NiTi Bridge). The solid yellow circle indicates the adsorption site.

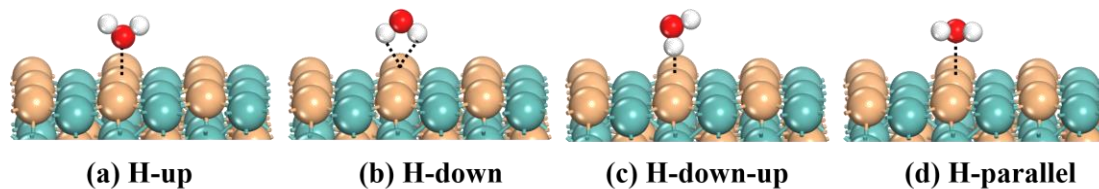

**Fig. S5** H<sub>2</sub>O molecule adsorbed at the Ti top site with four different initial orientations on the NiTi alloy surface. (a) H-up (H<sub>2</sub>O molecular plane is normal to the alloy surface with two hydrogen atoms sitting at the same height, and two hydrogen atoms are above the oxygen atom), (b) H-down (two hydrogen atoms sit at the same height and below the oxygen atom), (c) H-down-up (only one of O-H bonds point to the alloy surface), and (d) H-parallel (H<sub>2</sub>O molecular plane is normal to the alloy surface with two hydrogen atoms sitting at the same height).

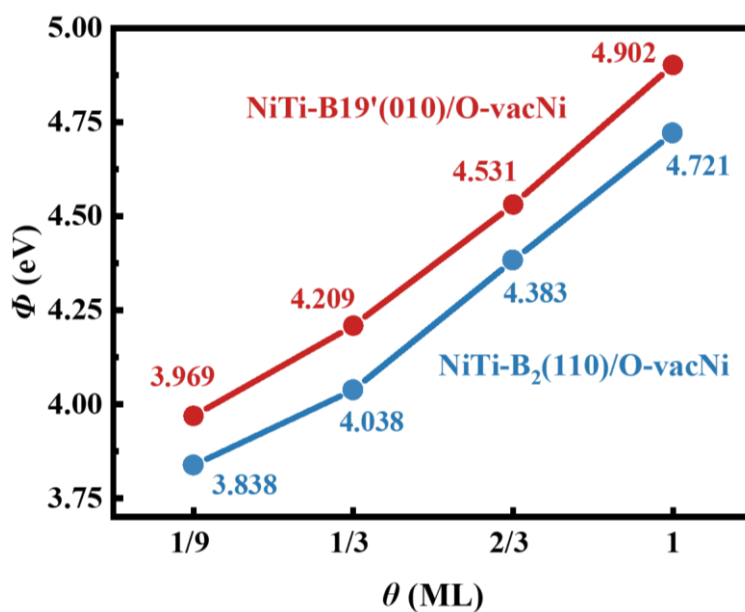

**Fig. S6** Work functions ( $\Phi$ ) of the NiTi-B<sub>2</sub>(110)/O-vacNi and NiTi-B19'(010)/O-vacNi surfaces at different  $\theta$ .

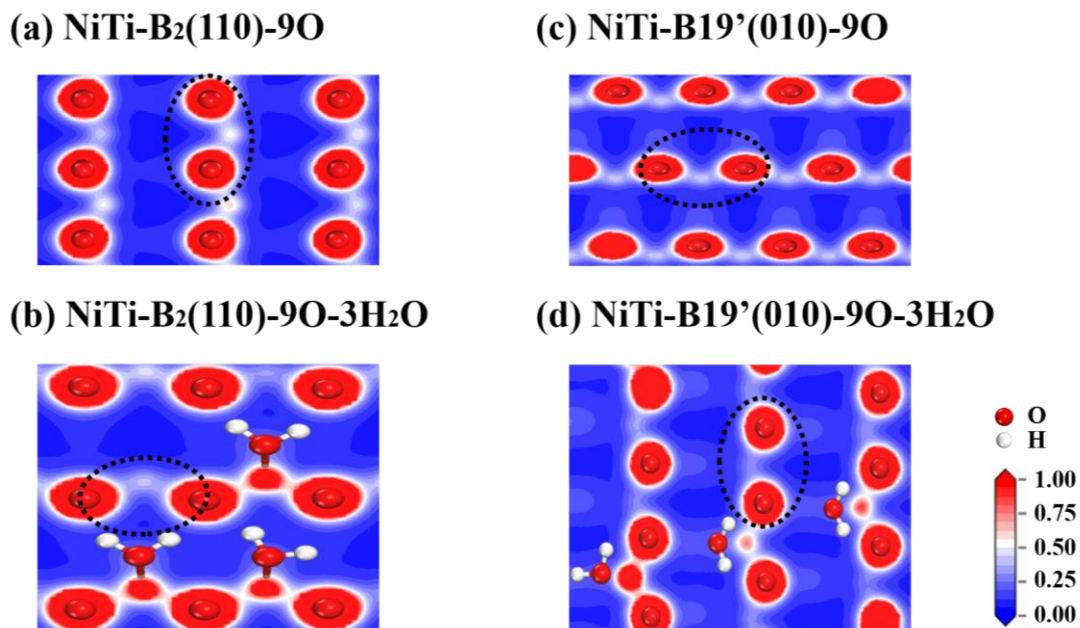

**Fig. S7** Electron density analysis of the adsorption structures of O and H<sub>2</sub>O on the NiTi alloy surfaces.

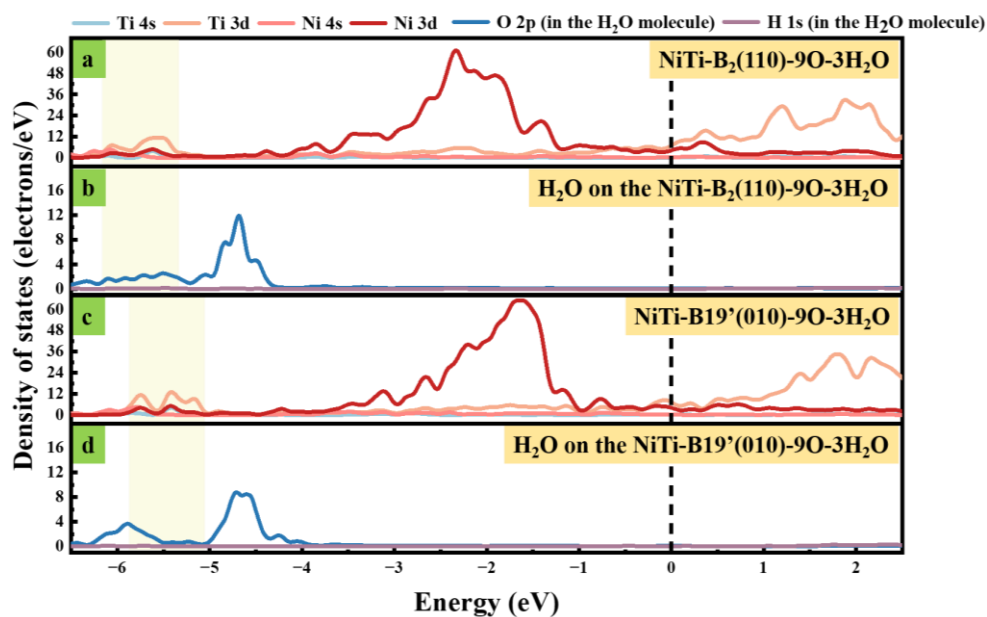

**Fig. S8** Partial density of states (PDOS) between H<sub>2</sub>O and surface Ti/Ni atoms on the NiTi alloy surfaces.

**Table S1** The indirect interaction energy ( $E_{ind}$ ) of O atoms adsorbed on the NiTi alloy surface for different  $\theta$ .

| $\theta$ (ML) | $E_{ind}$ (eV)              |                  |
|---------------|-----------------------------|------------------|
|               | NiTi-B <sub>2</sub> (110)/O | NiTi-B19'(010)/O |
| 1/9           | —                           | —                |
| 1/3           | -0.32                       | -0.07            |
| 2/3           | -0.44                       | -0.19            |
| 1             | -0.53                       | -0.23            |

**Table S2** Surface vacancy formation energies ( $E_{form}^{vac}$ ) of Ni or Ti vacancies on the clean NiTi-B<sub>2</sub>(110) and NiTi-B19'(010) surfaces.

| Type of slab                    | $E_{vac}$ (eV) |
|---------------------------------|----------------|
| NiTi-B <sub>2</sub> (110)-vacNi | 1.25           |
| NiTi-B <sub>2</sub> (110)-vacTi | 1.06           |
| NiTi-B19'(010)-vacNi            | 1.28           |
| NiTi-B19'(010)-vacTi            | 1.12           |

**Table S3** Adsorption energy ( $E_{ads}(H_2O)$ ) of one H<sub>2</sub>O molecule adsorption at varied sites on the clean NiTi-B<sub>2</sub>(110) and NiTi-B19'(010) surfaces.

| Type of slab              | Initial site of H <sub>2</sub> O | $E_{ads}(H_2O)$ (eV) | Final site of H <sub>2</sub> O |
|---------------------------|----------------------------------|----------------------|--------------------------------|
| NiTi-B <sub>2</sub> (110) | Ni Top                           | -1.37                | Ti Top                         |
|                           | Ti Top                           | -1.47                | Ti Top                         |
|                           | NiNi Bri-1                       | -1.37                | Ti Top                         |
|                           | NiNi Bri-2                       | -1.30                | Ti Top                         |
|                           | Hcp                              | -1.37                | NiNi Bri-2                     |
|                           | NiTi Bri                         | -1.42                | Ti Top                         |
| NiTi-B19'(010)            | Ni Top                           | -1.01                | Ti Top                         |
|                           | Ti Top                           | -1.00                | Ti Top                         |
|                           | NiNi Bri                         | -1.00                | Ti Top                         |
|                           | Hcp                              | -1.03                | Ti Top                         |
|                           | NiTi Bri-1                       | -1.00                | Ti Top                         |
|                           | NiTi Bri-2                       | -1.02                | Ti Top                         |

**Table S4** Adsorption energy ( $E_{ads}(H_2O)$ ) of one H<sub>2</sub>O molecule adsorption at varied sites on the NiTi-B<sub>2</sub>(110)-9O and NiTi-B19'(010)-9O surfaces.

| Type of slab                 | Initial site of H <sub>2</sub> O | $E_{ads}(H_2O)$ (eV) | Final site of H <sub>2</sub> O |
|------------------------------|----------------------------------|----------------------|--------------------------------|
| NiTi-B <sub>2</sub> (110)-9O | Ni Top                           | -1.17                | Hcp                            |
|                              | O Top                            | -0.35                | OO Bri                         |
|                              | OO Bri                           | -0.38                | OO Bri                         |
|                              | Hcp                              | -1.18                | Hcp                            |
| NiTi-B19'(010)-9O            | Ni Top                           | -0.66                | NiTi Bri                       |
|                              | O Top                            | -0.65                | NiTi Bri                       |
|                              | OO Bri                           | -0.64                | NiTi Bri                       |
|                              | NiNi Bri                         | -0.65                | NiTi Bri                       |
|                              | NiTi Bri                         | -0.65                | NiTi Bri                       |
